# Supplementary material for: Proteomic Analysis of Human Follicular Fluid Reveals the Pharmacological Mechanisms of the Chinese Patent Drug Kunling Pill for Improving Diminished Ovarian Reserve
Source: Evid Based Complement Alternat Med. 2022 May 28;2022:5929694. doi: 10.1155/2022/5929694 (PMC9167067; doi:10.1155/2022/5929694)
Supplement: Supplementary Materials — Table S1: components of KLP. Table S2: the baseline clinical parameters of the study participants before KLP treatment. Table S3: the main effective ingredients of KLP. [file 5929694.f1.zip]

Archive with 3 entries (3 files):
- 5929694.f1/supplementary data table  S1.docx
- 5929694.f1/supplementary data table  S2.docx
- 5929694.f1/supplementary data table  S3 (1).docx
